# Supplementary material
Source: publisher figshare collection journal article supplement (https://acs.figshare.com/ndownloader/files/4302643)
Supplement: Supplementary file 1 [file 4302643]

## Supporting Information

### Effect of Side-Chain Structure of Rigid Polyimide Dispersant on Mechanical Properties of Single-Walled Carbon Nanotube/Cyanate Ester Composite

Wei Yuan,<sup>1</sup> Weifeng Li,<sup>2</sup> Yuguang Mu,<sup>2</sup> and Mary B. Chan-Park<sup>\*,1</sup>

<sup>1</sup> School of Chemical and Biomedical Engineering, Nanyang Technological University,  
62 Nanyang Drive, Singapore 637459, Singapore

<sup>2</sup> School of Biological Sciences, Nanyang Technological University, 60 Nanyang  
Drive, Singapore 637551, Singapore

E-mail: [mbechan@ntu.edu.sg](mailto:mbechan@ntu.edu.sg)

To study the effect of dispersant on the tensile properties of dispersant/CE mixture, we added dispersants to neat CE (without SWNTs) and tested the tensile properties of the resulting cured films. The dispersant contents we used were 1 wt% and 5 wt%, so that the relative ratios of dispersants to CE in these unreinforced films are similar to those in SWNTs reinforced dispersant/CE films. Detailed tensile properties are listed in Table S1. The results show that 1 or 5 wt% of dispersant has negligible effect on the tensile properties of the resulting CE composites. We conclude that the effect of dispersant-functionalized SWNTs on tensile properties of CE can be mainly attributed to the SWNTs.

Table S1. Mechanical properties of neat CE and dispersant/CE composites

| Sample           | $E$ (GPa)   | $\sigma$ (MPa) | $\varepsilon$ (%) | $T^a$ (MJ m <sup>-3</sup> ) |
|------------------|-------------|----------------|-------------------|-----------------------------|
| Neat CE          | 3.08 ± 0.14 | 101.1 ± 6.0    | 4.0 ± 0.3         | 2.1 ± 0.2                   |
| PI(1 wt%)/CE     | 3.15 ± 0.09 | 100.3 ± 5.2    | 3.8 ± 0.3         | 2.0 ± 0.3                   |
| PI-GNE(1 wt%)/CE | 3.00 ± 0.17 | 97.1 ± 5.8     | 3.9 ± 0.4         | 2.0 ± 0.2                   |
| PI-BDA(1 wt%)/CE | 3.06 ± 0.12 | 103.2 ± 4.4    | 4.1 ± 0.3         | 2.2 ± 0.3                   |
| PI(5 wt%)/CE     | 3.31 ± 0.08 | 96.7 ± 4.0     | 3.6 ± 0.2         | 1.9 ± 0.1                   |
| PI-GNE(5 wt%)/CE | 3.18 ± 0.10 | 98.6 ± 7.2     | 3.8 ± 0.3         | 2.0 ± 0.2                   |
| PI-BDA(5 wt%)/CE | 3.22 ± 0.09 | 103.3 ± 5.7    | 3.8 ± 0.3         | 2.1 ± 0.3                   |

<sup>a</sup> Calculated from the area under the stress-strain curve.
